# Supplementary material
Source: HighWire-hosted journal article supplement (https://www.cmaj.ca/highwire/filestream/69455/field_highwire_adjunct_files/0/170880-res-1-at.pdf)
Supplement: 170880-res-1-at.pdf [file 170880-res-1-at.pdf]

**Appendix 1 (as supplied by the authors):** Provinces/territories that administered both the Household Food Security Survey Module and the Breastfeeding Module, by survey cycle

|                           | 2005 | 2007/2008 | 2009/2010 | 2011/2012 | 2013/2014 |
|---------------------------|------|-----------|-----------|-----------|-----------|
| Alberta                   | X    | X         | X         | X         | X         |
| British Columbia          | X    | X         | X         | X         |           |
| Manitoba                  |      | X         | X         | X         |           |
| New Brunswick             |      | X         |           | X         | X         |
| Newfoundland and Labrador |      | X         | X         | X         |           |
| Northwest Territories     | X    | X         | X         | X         | X         |
| Nova Scotia               | X    | X         | X         | X         | X         |
| Nunavut                   | X    | X         | X         | X         | X         |
| Ontario                   | X    | X         | X         | X         | X         |
| Prince Edward Island      | X    | X         |           | X         |           |
| Quebec                    | X    | X         | X         | X         | X         |
| Saskatchewan              |      | X         | X         | X         |           |
| Yukon                     |      | X         | X         | X         |           |
